# Supplementary material
Source: publisher figshare collection journal article supplement (https://acs.figshare.com/ndownloader/files/3721297)
Supplement: Supplementary file 1 [file 3721297]

# Surface Structure and Current Transport Property of Boron and Phosphorous Co-doped Silicon Nanocrystals

*Masato Sasaki, Shinya Kano\*, Hiroshi Sugimoto, Kenji Imakita, and Minoru Fujii\*.*

Department of Electrical and Electronic Engineering, Graduate School of Engineering, Kobe University,  
Rokkodai, Nada, Kobe 657-8501, Japan

E-mail: kano@eedept.kobe-u.ac.jp, fujii@eedept.kobe-u.ac.jp.

Tel: +81-78-803-6081.

(a) Determination of integral intensities

The integral intensities are estimated after the subtraction of background spectra. The integration ranges of Si-O-Si, B-O-B, Si-H and H-O-H modes are 915 – 1220, 1300 – 1500, 2000 – 2300 and 1550 – 1800  $\text{cm}^{-1}$ , respectively.

(b) IR absorption spectra of the Si-O-Si modes at room temperature and at 90°C.

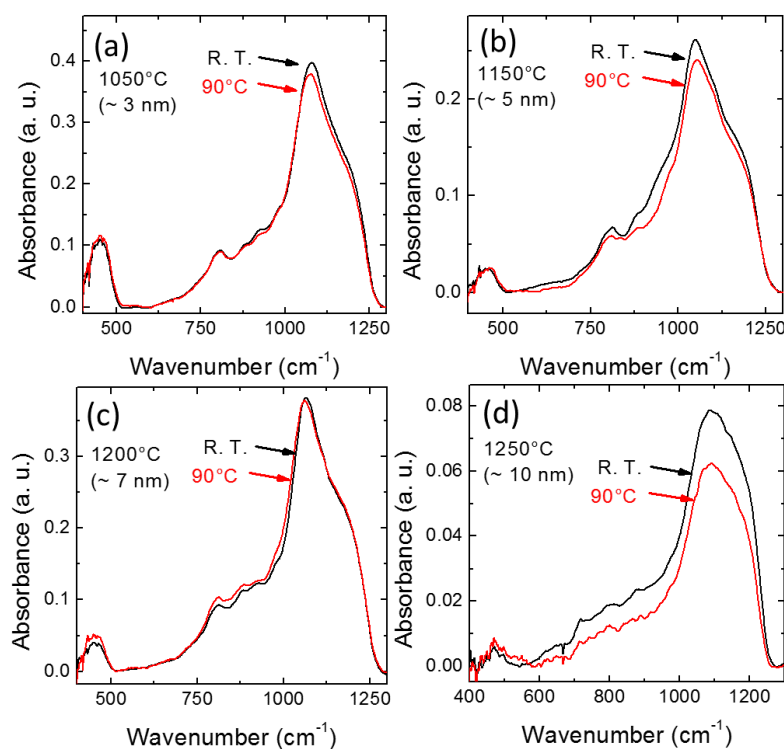

**Figure S1.** IR absorption spectra (Si-O-Si asymmetric stretching mode) of Si-NC film at room temperature (black curves) and at 90°C (red curves) grown at (a) 1050°C, (b) 1150°C, (c) 1200°C and (d) 1250°C.

In Figs. S1, IR absorption spectra of the Si-O-Si modes at room temperature and at 90°C are compared. In all the samples grown at different temperatures, no significant change of the intensity is observed.
